# Supplementary material for: Unleashing the potential of noncanonical amino acid biosynthesis to create cells with precision tyrosine sulfation
Source: PubMed Central journal article supplement (PMC9481576; doi:10.1038/s41467-022-33111-4), 2022-09-16
Supplement: 41467_2022_33111_MOESM3_ESM.pdf [file 41467_2022_33111_MOESM3_ESM.pdf]

**Title:** Supplementary Data 1:

**Description:** DNA oligos used in this study.
